# Supplementary material for: Structural characterization of the Fddd phase in a diblock copolymer thin film by electron microtomography
Source: Royal Society of Chemistry journal article supplement (doi:10.1039/c1sm06236k), 2011-01-01
Supplement: c1sm06236k.pdf [file c1sm06236k.pdf]

**Supplementary Information for :**

**Structural Characterization of *Fddd* phase in Diblock Copolymer Thin Film  
by Electron Microtomography**

Jueun Jung, Hae-Woong Park, Junyoung Lee, Haiying Huang, Taihyun Chang\*,  
Yecheol Rho, Moonhor Ree

*Department of Chemistry and Division of Advanced Materials Science,  
Pohang University of Science and Technology (POSTECH), Pohang, 790-784, Korea*

Hidekazu Sugimori<sup>‡</sup>, Hiroshi Jinnai<sup>‡,§</sup>

*<sup>‡</sup>Department of Macromolecular Science and Engineering, Graduate School of Science and Engineering,  
Kyoto Institute of Technology, Kyoto 606-8585, Japan*

*<sup>§</sup>JST ERATO Takahara Soft Interface Project and Institute for Materials Chemistry and Engineering (IMCE), CE80,  
Kyushu University, 744 Motoooka, Nishi-ku, Fukuoka 819-0395, Japan*

E-mail: tc@postech.ac.kr

### ***Fddd* phase in bulk**

Transmission small-angle X-ray scattering (TSAXS) experiment was conducted at the 4C1 beam line of the Pohang Accelerator Laboratory, Pohang, Korea.<sup>1</sup> Wavelength of the X-ray beam was 1.21 Å and sample-to-detector distance was 2.1 m. The TSAXS specimen was prepared in a cell consisting of a 1 mm thick Al spacer and Kapton® film windows. Prior to *in-situ* heating experiment, the bulk specimen was annealed at 120°C for 24 h in vacuo. The TSAXS profiles were obtained as the sample was heated from 120°C to 200°C at a rate of 1°C/min and the beam exposure time to obtain each pattern was 50 sec.

Upon heating, the PS-*b*-PI sample exhibited various order-order transitions. Figure S1 (a) displays representative TSAXS profile of each phase obtained during heating. These profiles are plotted as a function of wave vector  $q = (4\pi/\lambda)\sin(\theta/2)$  and circular-averaged intensity. Reflection peaks are labeled with the value of  $q/q^*$  where  $q^*$  is the wave vector of the principal peak. The initial specimen before heating exhibits LAM showing peaks at the integer multiple wave-vector positions of the primary peak. As the temperature rises, the first order peak becomes broader due to the reflections from  $\{101\}_{\text{HPL}}$  and  $\{102\}_{\text{HPL}}$  in ABC stack type HPL phase.<sup>2</sup> At 144°C, the HPL phase is fully developed. And, at 160°C, the regularly spaced reflections, a characteristic of lamellar structure, disappear and a complex scattering profile corresponding to *Fddd* phase is developed. Reflection peaks appear at  $q/q^*$  ( $q^* = 0.293 \text{ nm}^{-1}$ ) of 0.94, 1, 1.22, 1.55, 1.72, 1.81, 1.95, 2.00. These wave vectors of observed reflections are indicated by the arrows in Figure S1, and their miller indices are listed in Table S1. From the data, lattice parameters for the *Fddd* space group was calculated as  $a : b : c = 24.6 \text{ nm} : 50.0 \text{ nm} : 89.8 \text{ nm}$ . At a higher temperature, *Fddd* phase is converted to double gyroid phase showing two familiar peaks appearing at  $q/q^*$  of  $\sqrt{6}$  and  $\sqrt{8}$  before going into the disordered state.

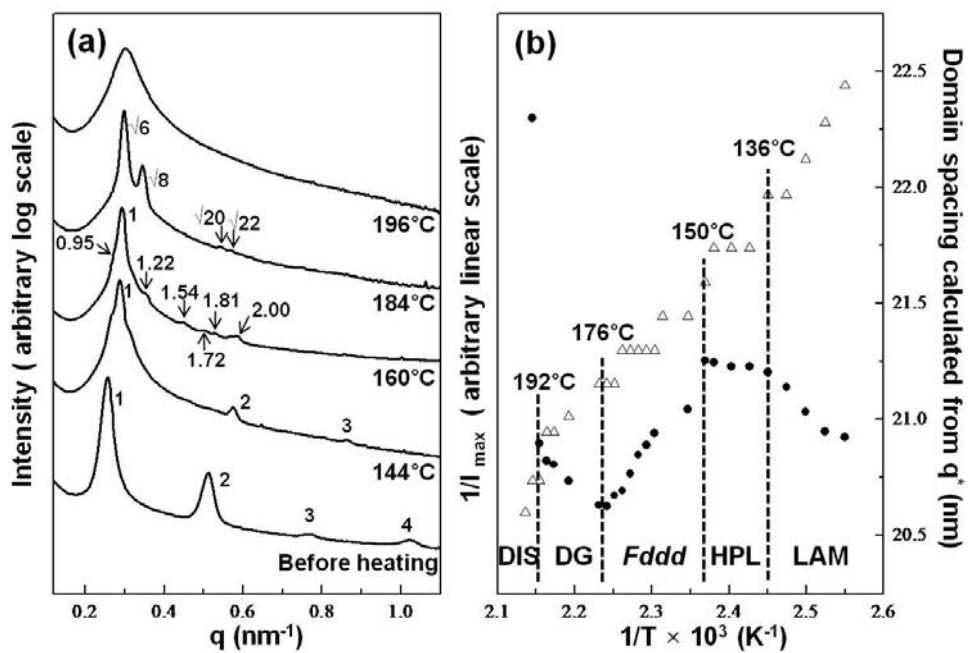

**Figure S1.** (a) Representative TSAXS profile of each phases obtained at different temperatures in the PS-*b*-PI bulk. Each peak is labeled with the ratio ( $q/q^*$ ) relative to the principal peak ( $q^*$ ). (b) The plot of the change of inverse intensity of primary peak and domain spacing ( $d = 2\pi/q^*$ ) against the reciprocal of the absolute temperature.

**Table S1.** Wave vectors of the observed reflections and their Miller indices of the reflection planes from *Fddd* TSAXS profile obtained at 160°C.

| $q$ (nm <sup>-1</sup> ) | $q/q^*$ | $hkl^{a)}$ |
|-------------------------|---------|------------|
| 0.278                   | 0.948   | 004        |
| 0.293 ( $q^*$ )         | 1.00    | 111        |
| 0.358                   | 1.22    | 113        |
| 0.451                   | 1.54    | 115        |
| 0.503                   | 1.72    | 040        |
| 0.531                   | 1.81    | 202        |
| 0.587                   | 2.00    | 222        |

a) Miller indices corresponding to the observed reflections.

To estimate the temperature windows of stable phases, the reciprocal intensity of the primary peak and the domain spacing ( $d = 2\pi/q^*$ ) are plotted against the reciprocal temperature as shown in Figure S1 (b). Three order-order transitions takes place at 136°C (LAM-HPL), 150°C (HPL-*Fddd*) and 176°C (*Fddd*-DG). And order to disorder transition from DG phase occurs at 192°C.

**Electronic supplementary information (ESI) available :**

3D movie of Figure 3 is attached as MPEG video.

**References**

1. J. Bolze, J. Kim, J. Y. Huang, S. Rah, H. S. Youn, B. Lee, T. J. Shin, M. Ree, *Macromol. Res.* **2002**, *10*, 2-12.
2. Y. L. Loo, R. A. Register, D. H. Adamson, A. J. Ryan, *Macromolecules* **2005**, *38*, 4947-4949.
